# Supplementary material for: What a Difference in Pressure Makes! A Framework Describing Undergraduate Students’ Reasoning about Bulk Flow Down Pressure Gradients
Source: Atypon-hosted journal article supplement (doi:10.1187/cbe.20-01-0003), 2023-03-27
Supplement: combinedsupmats.pdf [file combinedsupmats.pdf]

# Supplemental Material

*CBE—Life Sciences Education*

Doherty *et al.*

Table S1: Number of students and courses providing written data for RQ2.

| <b>Institution and Course</b> | <b>Version of Item</b> | <b>Beginning</b> | <b>End</b> |
|-------------------------------|------------------------|------------------|------------|
| <b>CC B</b>                   |                        |                  |            |
| Non-majors Phys A             | Blood flow             | 18               | 12         |
| <b>R1 A</b>                   |                        |                  |            |
| Non-majors Phys A             | Blood flow             | 113              | 77         |
| Majors Intro Bio A            | Blood flow             | 115              | 105        |
| Majors Intro Bio A            | Phloem sap flow        | 117              | 130        |
| Upper Division Phys A         | Phloem sap flow        | 47               | 44         |
| Upper Division Phys B         | Phloem sap flow        | 37               |            |
| Upper Division Phys C         | Blood flow             | 44               | 45         |
| <b>R2 B</b>                   |                        |                  |            |
| Non-majors Phys A             | Blood flow             | 315              | 242        |
| Upper Division Phys A         | Blood flow             |                  | 43         |
| <b>R1 C</b>                   |                        |                  |            |
| Majors Intro Bio A            | Blood flow             | 158              | 91         |
| <b>R1 D</b>                   |                        |                  |            |
| Upper Division Phys A         | Blood flow             | 61               | 64         |
| Upper Division Phys B         | Blood flow             | 25               | 29         |

Figure S1: Description of the course sequence of biology and allied health majors at two institutions. Arrows indicate the time points for data collection. Numbers within the arrow denote the number of students interviewed. Within a course, the same students were interviewed at both time points.

| Year                            | Freshman/Sophomore                 |                                       |                                          | Junior               | Senior                               |
|---------------------------------|------------------------------------|---------------------------------------|------------------------------------------|----------------------|--------------------------------------|
|                                 | ↓4↓                                |                                       | ↓5↓                                      | ↓5↓ ↓5↓              | ↓5↓                                  |
| 4-yr A Biology Majors           | Intro Bio I: Ecology and Evolution | Intro Bio II: Cell and Molec.         | Intro Bio III: Plant & Animal Physiology | 300-level Physiology | 400-level Plant or Animal Physiology |
|                                 | ↓3↓                                | ↓3↓                                   |                                          | ↓5↓                  | ↓5↓                                  |
| 4-yr A Pre-Allied Health Majors | Elementary Human Physiology        | Anatomy*                              |                                          | Patho-physiology     | Care in Illness                      |
|                                 | ↓5↓                                | ↓7↓                                   | ↓6↓                                      |                      |                                      |
| CC A Biology Majors             | Intro Bio I: Cell and Molec.       | Intro Bio II: Animal Phys., Evolution | Intro Bio III: Plant Phys., Ecology      |                      |                                      |
|                                 | ↓1↓                                | ↓2↓                                   | ↓1↓                                      |                      |                                      |
| CC A Pre-Allied Health Majors   | Human Anatomy & Physiology I       | Human Anatomy & Physiology II         |                                          |                      |                                      |

\*Anatomy can be taken before or after Human Physiology at this institution.

Figure S2: Assessment items used in the short-answer data collection for RQ2 with three tubes, instead of the five tubes used in interview data collection for RQ1.

**Blood flow item**

A scientist is studying blood flow in the aorta of three different animal species; a zebra, a camel, and an elk. She found that the composition of the blood was identical in each animal as well as the diameter of their aortas, but the rate of blood flow through the aorta was different. The scientist measured the following pressures at the beginning (i.e., ascending aorta) and near the end (i.e., abdominal aorta) of the aorta.

| Blood vessel | Start pressure | End pressure |
|--------------|----------------|--------------|
| Zebra        | 106            | 102          |
| Camel        | 93             | 91           |
| Elk          | 83             | 75           |

Which animal has the greatest flow rate (L/min) of blood through the aorta?

- a) Zebra
- b) Camel
- c) Elk

Explain why the animal you selected has the greatest flow rate (L/min) of blood through the aorta.

**Phloem sap flow item**

A scientist is studying sap flow in phloem tubes in three different tree, an American beech, a white oak, and an American chestnut of similar size and age. She found that the composition of the sap was identical among the trees as well as the diameter of their phloem tubes, but the rate of sap flow through the phloem tubes was different. The scientist measured the following pressures at the top (i.e., in the tree crown) and near the bottom (i.e., the base of the trunk) of each phloem tube.

| Phloem tube | Start pressure | End pressure |
|-------------|----------------|--------------|
| Beech       | 0.60           | 0.35         |
| White oak   | 1.20           | 1.00         |
| Chestnut    | 0.90           | 0.80         |

Which tree has the greatest flow rate (L/hour) of sap through the phloem tube?

- a) beech
- b) white oak
- c) chestnut

Explain why the tree you selected has the greatest flow rate (L/hour) of sap through the phloem tube.
